# Supplementary material for: Burkholderia cenocepacia Lipopolysaccharide Modification and Flagellin Glycosylation Affect Virulence but Not Innate Immune Recognition in Plants
Source: PubMed Central journal article supplement — mBio. 2015 Jun 4;6(3):e00679-15. doi: 10.1128/mBio.00679-15 (PMC4462625; doi:10.1128/mbio.00679-15), 2015-06-04
Supplement: mbo003152337sf2.pdf [file mbo003152337sf2.pdf]

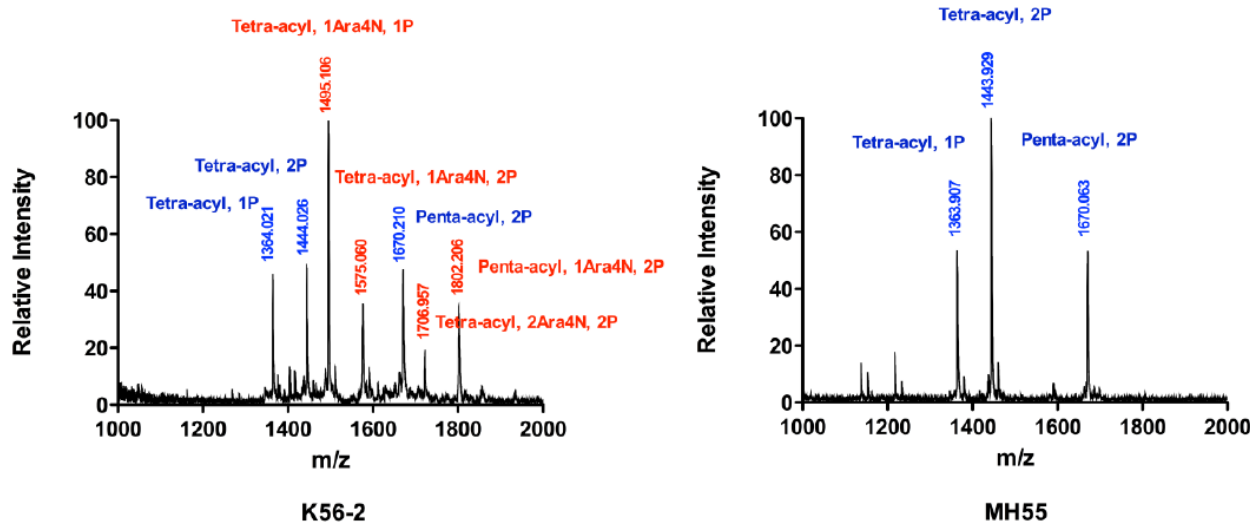

Figure S2. MALDI-TOF spectra of purified lipid A produced by the parental *B. cenocepacia* K56-2 and the  $\Delta arnT$  *lptG*<sup>S</sup> mutant MH55 (Table 1). Lipid A samples were prepared and processed as indicated in Materials and Methods. The profiles represented were obtained using the negative ion mode. Ion peaks are color coded to indicate ions corresponding to species containing (red) vs. those lacking (blue) L-Ara4N, respectively. Only ions denoting species without L-Ara4N are found in the MH55 lipid A spectrum.
