# Supplementary material for: Burkholderia cenocepacia Lipopolysaccharide Modification and Flagellin Glycosylation Affect Virulence but Not Innate Immune Recognition in Plants
Source: PubMed Central journal article supplement — mBio. 2015 Jun 4;6(3):e00679-15. doi: 10.1128/mBio.00679-15 (PMC4462625; doi:10.1128/mbio.00679-15), 2015-06-04
Supplement: mbo003152337sf3.pdf [file mbo003152337sf3.pdf]

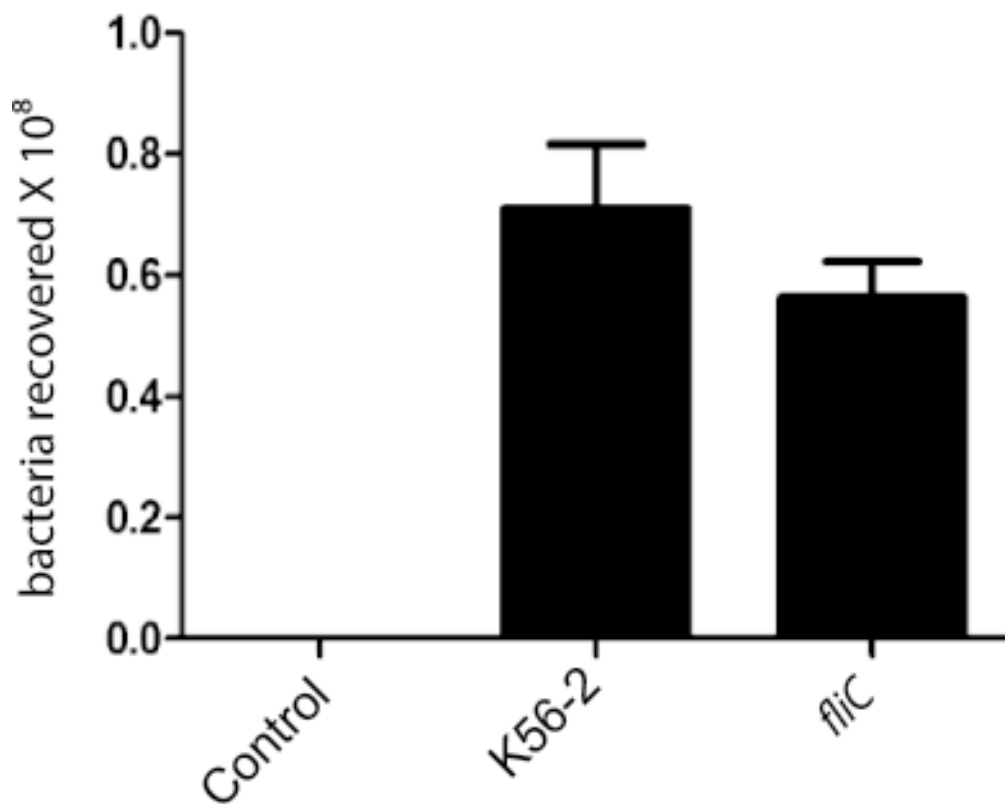

Figure S3. Infection of *A. thaliana* by the infiltration method. Graph represents bacterial counts on day 7 post infection recovered from *Arabidopsis* leaves inoculated with *B. cenocepacia* by infiltration.
