# Supplementary material for: Burkholderia cenocepacia Lipopolysaccharide Modification and Flagellin Glycosylation Affect Virulence but Not Innate Immune Recognition in Plants
Source: PubMed Central journal article supplement — mBio. 2015 Jun 4;6(3):e00679-15. doi: 10.1128/mBio.00679-15 (PMC4462625; doi:10.1128/mbio.00679-15), 2015-06-04
Supplement: mbo003152337sf4.pdf [file mbo003152337sf4.pdf]

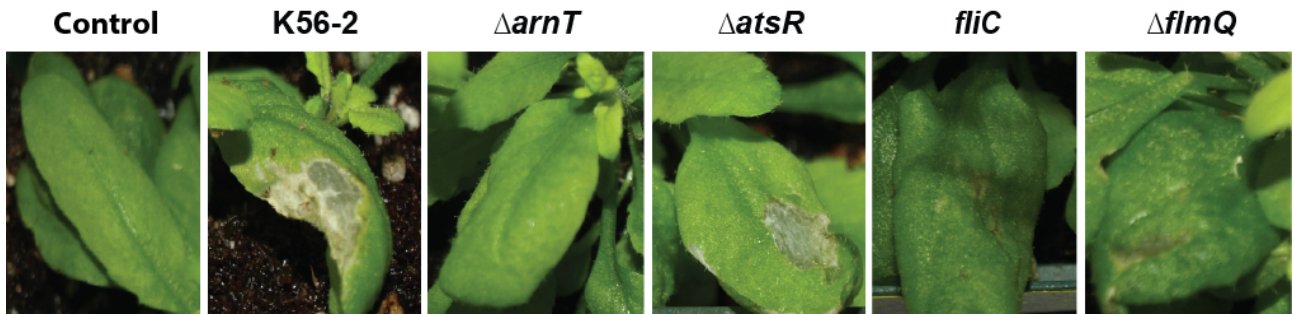

Figure S4. Infection of *Arabidopsis* seedlings by the inoculation method. Representative images of leaves inoculated with  $10^8$  dose of the various strains used in this study.
